# Supplementary material
Source: HighWire-hosted journal article supplement (https://cmajopen-stage.highwire.org/highwire/filestream/88212/field_highwire_adjunct_files/1/open-2021-0180-original-submission.pdf)
Supplement: open-2021-0180-original-submission.pdf [file open-2021-0180-original-submission.pdf]

1  
2  
3 1 **Urban and rural trench fever in Manitoba- associated with culture negative endocarditis**  
4  
5 2 **and systemic embolization: a retrospective chart review study of *Bartonella* serologies from**  
6  
7 3 **2010-2020**

8  
9  
10 4 Carl Boodman<sup>1,2</sup>, Terence Wuerz<sup>1,6</sup>, Philippe Lagacé-Wiens<sup>2,3</sup>, Robbin Lindsay<sup>4</sup>, Antonia  
11  
12 5 Dibernardo<sup>4</sup>, Jared Bullard<sup>2,5</sup>, Derek Riley Stein<sup>2,5</sup>, Yoav Keynan<sup>1,2</sup>

- 13  
14 6 1. Section of Infectious Diseases, Department of Internal Medicine, Max Rady College of Medicine,  
15  
16 University of Manitoba, Winnipeg, Manitoba, Canada  
17  
18 7 2. Department of Medical Microbiology and Infectious Diseases, Max Rady College of Medicine,  
19  
20 University of Manitoba, Winnipeg, Manitoba, Canada  
21  
22 8 3. Shared Health, Winnipeg, Manitoba, Canada  
23  
24 9 4. National Microbiology Laboratory, Winnipeg, Manitoba, Canada  
25  
26 10 5. Cadham Provincial Laboratory, Winnipeg, Manitoba, Canada  
27  
28 11 6. Department of Community Health Sciences, Max Rady College of Medicine, University of  
29  
30  
31 12  
32 13  
33 14  
34 15  
35

36 16 **Keywords:** *Bartonella*, serology, endocarditis, Canada

37  
38 17 **Running title:** *Bartonella* serologies Manitoba, Canada

39  
40 18 **Word count:** 2513

41  
42 19 **Corresponding author:**

43  
44 20 Carl Boodman

45  
46 21 Room 543 Basic Medical Sciences Building

47  
48 22 745 Bannatyne Avenue

49  
50 23 Winnipeg, MB, Canada

51  
52 24 R3E 0J9

1  
2  
3 25 boodmanc@myumanitoba.ca  
4

5 26 431-374-4187  
6

7  
8 27 **Alternate corresponding author:**  
9

10 28 Dr. Yoav Keynan  
11

12 29 BMSB 507 - Department of Medical Microbiology,  
13

14 30 745 Bannatyne Avenue, Winnipeg, MB., R3E 0J9, Canada  
15

16 31 **Tel:** (204) 480-1317  
17

18 32 **Fax:** (204) 789-3926  
19

20 33 **E-mail:** [Yoav.Keynan@umanitoba.ca](mailto:Yoav.Keynan@umanitoba.ca)  
21  
22  
23  
24  
25

26 35 **40-word Summary:**  
27

28 36 This retrospective study includes all *Bartonella* serologies ordered in Manitoba, Canada from  
29  
30 37 2010 until 2020. We reviewed the charts of adult patients with positive *Bartonella* serologies to  
31  
32 38 extract clinical and demographic data.  
33  
34

35 39  
36  
37 40 **Funding statement:** This work is supported by the Hector Ma University of Manitoba Internal  
38  
39 41 Medicine Resident Research Award.  
40  
41

42 42 **Competing interests:** No competing interests.  
43  
44  
45  
46  
47 44  
48  
49 45  
50  
51  
52  
53  
54  
55  
56  
57  
58  
59  
60

1  
2  
3 **46 Abstract:**

4  
5 **47 Background:**

6  
7  
8 *Bartonella* are Gram-negative bacilli not identified by routine bacterial culture. Human disease  
9  
10 in North America is predominantly caused by *B. henselae* (cat scratch disease), and *B. quintana*  
11  
12 (trench fever). *B. quintana* is transmitted by body lice and has emerged among populations  
13  
14 experiencing homelessness. It is a leading cause of culture-negative infective endocarditis.  
15

16  
17 **52 Methods:**

18  
19 This retrospective study includes all *Bartonella* serologies ordered in Manitoba from January 1<sup>st</sup>  
20  
21 2010 until December 31<sup>st</sup>, 2020. We reviewed the charts of adult patients with positive  
22  
23 *Bartonella* serologies to extract clinical and demographic data. Descriptive statistics and Mann  
24  
25 Kendall trend test were performed using R Statistical Software (<https://www.r-project.org/>).  
26  
27

28  
29 **57 Results:**

30  
31 16 adults with positive *Bartonella* serologies were identified. Molecular species-level  
32  
33 identification occurred on explanted cardiac valves in 5 cases (31.3%): *B. quintana* was  
34  
35 identified in all 5 cases. Six (37.5%) individuals were diagnosed with probable *B. quintana*  
36  
37 infection, leading to a total of 11 *B. quintana* cases (68.8%). Of these, 8 (72.7%) were associated  
38  
39 with endocarditis. Four cases of *B. quintana* (36.4%) were likely associated with rural  
40  
41 acquisition. Four (25.0%) cases of probable *B. henselae* were identified. Of these, 2 (50%) had  
42  
43 fever and lymphadenopathy and 2 had endocarditis (50%).  
44  
45

46  
47 **65 Interpretation:**

48  
49 *B. quintana* is the leading cause of clinical disease among adults with positive *Bartonella*  
50  
51 serologies in Manitoba and is associated with severe endovascular infection. Transmission of *B.*  
52  
53  
54  
55  
56  
57  
58  
59  
60

1  
2  
3  
4  
5  
6  
7  
8  
9  
10  
11  
12  
13  
14  
15  
16  
17  
18  
19  
20  
21  
22  
23  
24  
25  
26  
27  
28  
29  
30  
31  
32  
33  
34  
35  
36  
37  
38  
39  
40  
41  
42  
43  
44  
45  
46  
47  
48  
49  
50  
51  
52  
53  
54  
55  
56  
57  
58  
59  
60

68 *quintana* in urban and rural settings reflects a lack of suitable housing both in inner-city  
69 Winnipeg as well as in remote communities.

70

71

72

73

Confidential

1  
2  
3 **74 Introduction:**  
4

5 *Bartonella* are Gram-negative intra-erythrocytic bacilli.(1,2) This genus of bacteria evades  
6  
7 identification by routine culture due to its slow replication time and niche within red blood  
8  
9 cells.(3,4) While over 45 different *Bartonella* species and subspecies infect different mammals,  
10  
11 human disease due to *Bartonella* in North America is primarily caused by two species: *B.*  
12  
13 *henselae* (cat scratch disease), and *B. quintana* (trench fever).(2,5) True to its name, cat scratch  
14  
15 disease usually occurs after a feline scratch or bite.(6,7) Its most common clinical manifestation  
16  
17 is regional lymphadenopathy.(7) *B. quintana* is transmitted in the feces of body lice, entering the  
18  
19 systemic circulation via abrasions in the skin (see figures 1 and 2).(8–10) Clinical disease due to  
20  
21 *B. quintana* was first described in 1915 in association with a relapsing febrile illness afflicting  
22  
23 World War I soldiers, thus coined “trench fever”.(11) *B. quintana* has since emerged among  
24  
25 urban populations experiencing homelessness.(8,9,12–15) Both *B. henselae* and *B. quintana* may  
26  
27 cause endovascular infections such as infective endocarditis and mycotic aneurysms.(16,17)  
28  
29 Serology is often used to diagnose *Bartonella* infections due to the difficulties in identifying  
30  
31 *Bartonella* with routine culture-based methods.(2,3) While patients with uncontrolled HIV may  
32  
33 develop other manifestations of *Bartonella* such as bacillary angiomatosis and peliosis, most  
34  
35 cases of *Bartonella* are not associated with HIV.(18)  
36  
37  
38  
39  
40  
41  
42  
43

44  
45 In Canada, serologic evidence of exposure to *B. henselae* is common, reflecting local  
46  
47 endemicity.(19) However, few cases of *B. quintana* have been documented in Canada.(20–24)  
48  
49 While the first Canadian case of *B. quintana* was described in 1996, 20 years elapsed before a  
50  
51 subsequent case was identified in 2016.(23,24) Since 2018, 6 cases of *B. quintana* have been  
52  
53 described among people experiencing under-housing from both inner-city and rural areas of  
54  
55  
56  
57  
58  
59  
60

1  
2  
3 97 Alberta and Manitoba.(20–22) All of these cases were associated with endocarditis, a rare and  
4  
5 98 severe manifestation of *B. quintana*, suggesting an undescribed burden of community  
6  
7  
8 99 transmission.(25) No systematic description of human body lice has occurred in Canada.  
9  
10 100  
11  
12 101 Canadian data on *Bartonella* infection is based on low-quality evidence: only a handful of case  
13  
14 102 reports and case series exist.(20–22,24) As bartonellosis is not a reportable disease in Canada,  
15  
16 103 *Bartonella* disease prevalence is unknown.(26) No Canadian studies have attempted to describe  
17  
18 104 *Bartonella* infection at a provincial level. The objective of this study is to retrospectively review  
19  
20 105 cases with positive *Bartonella* serologies ordered in Manitoba from 2010 to 2020 to assess  
21  
22 106 species type, demographic risk factors, clinical manifestations and treatment outcomes.  
23  
24  
25  
26 107  
27  
28 108  
29  
30  
31 109  
32  
33 110  
34  
35 111  
36  
37  
38  
39  
40  
41  
42  
43  
44  
45  
46  
47  
48  
49  
50  
51  
52  
53  
54  
55  
56  
57  
58  
59  
60

1  
2  
3 112 **Methods:**

4  
5 113 Ethics approval:

6  
7  
8 114 The study protocol was approved by the Research Ethics Board of the University of Manitoba's  
9  
10 115 Bannatyne Campus (H2020:374), Winnipeg's Health Sciences Centre (R/2020:147), St.  
11  
12 116 Boniface Hospital's Research Review Committee (RRC/2020/1978) and approved by the Shared  
13  
14 117 Health and Winnipeg Regional Health Authority's Research Access and Approval Committee  
15  
16  
17 118 (2020-059). Approval from Manitoba's Health Information Privacy Committee (No. 2020/2021-  
18  
19 119 79) was obtained to enable access to provincial serology results.

20  
21  
22 120 Setting, patients and data acquisition:

23  
24 121 We obtained the results of all *Bartonella* serologies ordered in the province of Manitoba from  
25  
26 122 January 1<sup>st</sup> 2010 until December 31<sup>st</sup>, 2020. Serological information was acquired from Cadham  
27  
28 123 Provincial Laboratory, Manitoba's provincial public health laboratory. *Bartonella* serology was  
29  
30 124 performed at Canada's National Microbiology Laboratory in Winnipeg, Manitoba using an  
31  
32  
33 125 indirect immunofluorescent antibody assay (IFA) to test for immunoglobulin G (IgG) antibodies  
34  
35 126 to *B. henselae* and *B. quintana* antigen.(27) A positive test was defined as a titer greater or equal  
36  
37 127 to 1:256. Maximum calculatable titer was 1:8192. Titers of 1:64 and 1:128 were considered  
38  
39 128 equivocal and titers below 1:64 were considered negative. Prior to 2017, Cadham Provincial  
40  
41  
42 129 Laboratory reported *Bartonella* serology results exclusively for *B. henselae* antigen. In 2017,  
43  
44 130 reporting included IgG response to both *B. henselae* and *B. quintana* antigens. There is known  
45  
46 131 serologic cross-reactivity between *B. henselae* and *B. quintana*.(2,28)

47  
48  
49 132

50  
51 133 Aggregate data was divided and analyzed according to positive, equivocal and negative result.

52  
53 134 While aggregate data included both pediatric and adult patients, all tests from individuals under

1  
2  
3 135 18 years of age at the time of serology request were discarded prior to chart review. We  
4  
5 136 retrospectively reviewed the charts of patients, 18 years and older at the time of *Bartonella*  
6  
7 137 serology request, who had positive *Bartonella* serologies. We extracted clinical, laboratory and  
8  
9 138 demographic data from emergency room visits and hospital admissions to Winnipeg's two  
10  
11 139 largest hospitals, the Health Sciences Centre and St. Boniface Hospital.

14  
15 140 Case definitions:

16  
17 141 Cases were classified as confirmed or probable *B. quintana* or *B. henselae* infection according to  
18  
19 142 case definitions for infectious conditions under public health surveillance.(29) Confirmed cases  
20  
21 143 had molecular confirmation of pathogen to species-level using either 16S rRNA sequencing,  
22  
23 144 species-specific polymerase chain reaction (PCR) or gene sequencing of *rpoB* gene. Probable  
24  
25 145 cases demonstrated *Bartonella* serologic positivity, compatible clinical syndrome and risk factors  
26  
27 146 consistent with either *B. henselae* or *B. quintana* acquisition, without species-level molecular  
28  
29 147 confirmation. Epidemiologic risk factors differ between *B. henselae* and *B. quintana*.(14,30) *B.*  
30  
31 148 *henselae* is associated with a history of a cat scratch or bite, whereas *B. quintana* is associated  
32  
33 149 with inadequate access to suitable housing and body lice ectoparasitosis.(30) Cases with low-  
34  
35 150 grade serologic positivity but failure to fulfill the criteria for compatible clinical syndrome and  
36  
37 151 epidemiologic risk factor were considered not to be a case of *Bartonella*, thus a false positive.  
38  
39 152 Considering the lack of suitable housing in many Northern communities in Manitoba, residence  
40  
41 153 in a remote area known to have inadequate housing without a description of feline exposure was  
42  
43 154 considered a risk factor for *B. quintana*.(20,22,24,31)

44  
45  
46  
47  
48  
49 155 Statistical analysis:

50  
51 156 Descriptive statistics and Mann Kendall trend test were performed using R Statistical Software  
52  
53 157 (version 3.5.3, 2019-03-11) with the Mann Kendal statistical package.(32)



1  
2  
3 158 **Results:**

4  
5 159 Aggregate data:

6  
7  
8 160 During the study period, a total of 1014 *Bartonella* serologies were ordered, of which 24 were  
9  
10 161 positive (2.4%), 94 (9.3%) were equivocal and 896 (88.4%) were negative (see table 1). Testing  
11  
12 162 volume increased during the study period from 51 in 2010 to 157 in 2020. An abrupt increase in  
13  
14 163 positive cases occurred in 2020 with 5.7% positivity (9 cases), compared to the average  
15  
16 164 positivity of 2.4% during the entire study period. The Mann Kendall trend test did not show a  
17  
18 165 statistically significant difference in percent test positivity over time ( $P= 0.15858$ ; Kendall's tau  
19  
20 166 statistic= 0.3522).

21  
22  
23 167  
24  
25 168 Causative pathogen and clinical manifestations:

26  
27  
28 169 16 adults with positive *Bartonella* serologies were identified (see table 2). Molecular species-  
29  
30 170 level identification occurred on explanted cardiac valves in five cases (31.3%): *B. quintana* was  
31  
32 171 identified in all five cases. Six (37.5%) individuals were diagnosed with probable *B. quintana*  
33  
34 172 infection, leading to a total of 11 *B. quintana* cases (68.8%). Of these, eight (72.7%) were  
35  
36 173 associated with endocarditis. Seven of the eight patients with endocarditis had evidence of  
37  
38 174 peripheral embolization (87.5%): four demonstrated intracranial complications with either  
39  
40 175 embolization and/or ruptured mycotic aneurysms and three had evidence of splenic infarcts.  
41  
42 176 Mitral and aortic valve involvement was most common. Among cases of endocarditis with  
43  
44 177 documented vegetation size, average vegetation size was 17 mm x 7 mm. Of the positive cases  
45  
46 178 associated with endocarditis, all but two were associated with elevated initial *Bartonella* titers of  
47  
48 179 8192 or 4096. Two individuals with *B. quintana* endocarditis had concomitant *Streptococcus*  
49  
50 180 *pneumoniae* bacteremia. Four (25.0%) cases of probable *B. henselae* were identified. Of these,  
51  
52  
53  
54  
55  
56  
57  
58  
59  
60

1  
2  
3 181 all had history of cat scratch, 2 (50%) had fever and lymphadenopathy and 2 had endocarditis  
4  
5 182 (50%).  
6  
7  
8 183

9  
10 184 Treatment and outcome:  
11

12 185 Six patients underwent valve replacement surgery and two patients underwent intravascular  
13  
14 186 coiling of a middle cerebral artery aneurysm. All patients with endocarditis were prescribed  
15  
16 187 antimicrobial therapy, with doxycycline and gentamicin and/or ceftriaxone, as the most common  
17  
18 188 regimens. One patient was prescribed doxycycline and rifampin. Individuals diagnosed with cat  
19  
20 189 scratch disease were treated with azithromycin. 14 of the 16 individuals with positive *Bartonella*  
21  
22 190 serologies survived (87.5%). The two individuals who died had multi-valvular *B. quintana*  
23  
24 191 endocarditis with ruptured intracranial mycotic aneurysms.  
25  
26  
27  
28 192

29  
30  
31 193 Epidemiology:  
32

33 194 The average age among individuals with positive *Bartonella* serologies was 48 years. Of the 16  
34  
35 195 individuals with positive *Bartonella* serologies, 12 were men and 4 were women, with gender  
36  
37 196 described as per hospital chart documentation. 12 individuals acquired their infection in  
38  
39 197 Winnipeg. Four cases of *B. quintana* (36.4%) were associated with likely rural acquisition  
40  
41 198 according to postal code. Three individuals resided in Northern Manitoba and one individual  
42  
43 199 lived in Nunavut. Of the four individuals with rural postal codes, only one individual lived in an  
44  
45 200 urban center (Winnipeg) for a prolonged period, according to hospital records. One case of *B.*  
46  
47 201 *quintana* was acquired in Eritrea prior to immigration. Two cases of *B. henselae* were acquired  
48  
49 202 in Winnipeg and 2 cases were acquired internationally. Of the cases of *B. quintana* acquired in  
50  
51 203 Winnipeg, 7 individuals experienced a lack of suitable housing. While 3 individuals were  
52  
53  
54  
55  
56  
57  
58  
59  
60

1  
2  
3 204 homeless at the time of *Bartonella* testing, 4 individuals lived in supportive housing or in single  
4  
5 205 room occupancy but depended on shelters for food and clothing. While the four individuals from  
6  
7 206 Northern communities were housed, 2 individuals from remote communities articulated a lack of  
8  
9  
10 207 running water at home and the presence of more than two people per bedroom, indicating a lack  
11  
12 208 of suitable housing.(33)

13  
14  
15 209 Comorbidities:

16  
17 210 Three of the 16 individuals (18.8%) with positive *Bartonella* serologies were living with HIV  
18  
19 211 and three were co-infected with Hepatitis C. Two individuals had previous valvular disease, one  
20  
21 212 with rheumatic heart disease and one with a patent ductus arteriosus. Three of the eleven  
22  
23 213 individuals (27.3%) infected with *B. quintana* had a description of ectoparasitosis in their  
24  
25 214 medical chart. Nine individuals (56.3%) had alcohol listed in their substance use history and six  
26  
27 215 individuals (37.5%) had descriptions consistent with alcohol use disorder in the medical chart  
28  
29 216 (emergency room visits for withdrawal or intoxication). Four individuals (25.0%) had a history  
30  
31 217 of injecting intravenous crystal methamphetamine.  
32  
33  
34

35 218

36  
37  
38 219 A table describing cases with equivocal *Bartonella* results is available in the appendix.  
39

40 220  
41  
42  
43  
44  
45  
46  
47  
48  
49  
50  
51  
52  
53  
54  
55  
56  
57  
58  
59  
60

1  
2  
3 221 **Interpretation:**  
4

5 222 *B. quintana* is the most common cause of *Bartonella* serologic positivity among adults in the  
6  
7 223 province of Manitoba. This differs from other high-income jurisdictions where cat scratch  
8  
9 224 disease caused by *B. henselae* is the predominant form of *Bartonella* infection.(17) Endocarditis  
10  
11 225 was present in the majority of our cases (62.5%). Of the 10 cases of endocarditis, 8 cases were  
12  
13 226 due to *B. quintana* and 2 were due to *B. henselae*. Unlike *B. henselae*, transmission of *B. quintana*  
14  
15 227 occurs via body lice ectoparasitosis and is thus inherently tied to public health concerns such as  
16  
17 228 access to suitable housing and running water. An exact quantification of *B. quintana* endocarditis  
18  
19 229 among those with positive *Bartonella* serologies is unknown. However, data from an outbreak of  
20  
21 230 *B. quintana* among homeless individuals in Seattle suggests that 20% of individuals who are  
22  
23 231 bacteremic with *B. quintana* will develop endocarditis.(25) Considering that only a minority of  
24  
25 232 individuals with positive *Bartonella* serology are bacteremic, the elevated proportion of  
26  
27 233 endocarditis in our study suggests a significant burden of undiagnosed trench fever and  
28  
29 234 *B. quintana* bacteremia in Manitoba.(13)  
30  
31  
32  
33  
34  
35  
36  
37

38 236 In the cases described here, endocarditis due to *B. quintana* predominantly involved the mitral  
39  
40 237 and aortic valves. This valvular predilection corroborates descriptions of *B. quintana* found  
41  
42 238 elsewhere.(34,35) Seven of the eight cases of *B. quintana* endocarditis (87.5%) demonstrated  
43  
44 239 embolization, including intracranial complications. This degree of embolization exceeds  
45  
46 240 descriptions from other studies where embolization is not often a salient feature.(16,34) This  
47  
48 241 may reflect a prolonged time to diagnosis and thus a greater burden of disease with higher  
49  
50 242 propensity to embolize and cause mycotic aneurysms.  
51  
52  
53  
54  
55  
56  
57  
58  
59  
60

1  
2  
3 243 Two cases of *B. quintana* endocarditis were associated with concomitant *Streptococcus*  
4  
5 244 *pneumoniae* bacteremia. To our knowledge, only one other case of polymicrobial endocarditis  
6  
7 245 has been described with *B. quintana* and *Staphylococcus aureus*.(36) The presence of gram-  
8  
9 246 positive cocci on the gram stain of patient 16's explanted valve suggests the possibility of acute  
10  
11 247 on subacute endocarditis: subacute *B. quintana* creating valvular damage and large vegetations  
12  
13 248 that provide a substrate for seeding when subsequent acute bacteremia occurs with a different  
14  
15 249 pathogen.  
16  
17  
18

19 250  
20  
21 251 *Bartonella* serologic positivity was predominantly identified in men in our study, a finding that  
22  
23 252 has been described elsewhere.(12,14) This may reflect the disproportional number of cases due  
24  
25 253 to *B. quintana* and the known preponderance of men within the homeless population in  
26  
27 254 Canada.(37) While *B. quintana*'s association with alcohol use is well-established, the association  
28  
29 255 with intravenous crystal methamphetamine use in our study has rarely been described.(12) One  
30  
31 256 Baltimore-based study demonstrated that over 37% of people who use intravenous drugs have  
32  
33 257 positive *Bartonella* serologies.(12) As *B. quintana*'s subacute bacteremia may last many months,  
34  
35 258 it is possible that *B. quintana* may be transmitted by shared syringes in addition to body lice  
36  
37 259 ectoparasitosis.(13) While ectoparasitosis was described in 3 individuals infected with  
38  
39 260 *B. quintana*, body lice were never explicitly mentioned in the medical chart. Individuals infected  
40  
41 261 with *B. quintana* described infestation with "bedbugs" and "itchy bugs" but not body lice per se.  
42  
43 262 This may reflect a lack of familiarity with body lice ectoparasitosis among health care providers  
44  
45 263 as well as individuals who are under-housed.  
46  
47  
48  
49  
50

51 264  
52  
53  
54  
55  
56  
57  
58  
59  
60

1  
2  
3 265 Among the four individuals who had a history of injecting crystal methamphetamine, three were  
4  
5 266 living with HIV and two were co-infected with hepatitis C. The association of *Bartonella*  
6  
7 267 infection with HIV, hepatitis C and intravenous stimulant use exemplifies a convergence of  
8  
9 268 homelessness, substance use and infection described by the syndemic theory of disease.(38)

10  
11  
12 269

13  
14 270 In this study, three cases were acquired in rural Manitoba and one in Nunavut. *B. quintana*'s  
15  
16 271 association with urban homelessness is well-established, leading to the designation of “urban  
17  
18 272 trench fever”.(15) However, rural transmission of *B. quintana* is largely under-recognized. A  
19  
20 273 recent case from Northern Alberta suggests a hidden endemicity of *B. quintana* and body lice  
21  
22 274 ectoparasitosis in remote communities in Canada.(20) Local transmission of *B. quintana* in  
23  
24 275 Northern Manitoba, Northern Alberta and Nunavut reflects the ongoing lack of suitable housing  
25  
26 276 and running water within many indigenous communities throughout Canada.(31)

27  
28  
29  
30  
31 277

32  
33 278 To understand the full burden of *B. quintana* in Manitoba, seroprevalence and ectoparasite  
34  
35 279 surveillance studies both in urban and rural areas are necessary. Cases with elevated *Bartonella*  
36  
37 280 titers should then undergo echocardiography to identify endocarditis prior to the development of  
38  
39 281 valvular damage or mycotic aneurysms. To prevent additional cases of *B. quintana* in both urban  
40  
41 282 and rural Manitoba, a government-sponsored and Indigenous-community directed program is  
42  
43 283 necessary to provide suitable housing and running water to both inner-city Winnipeg as well as  
44  
45 284 many remote communities. A similar Indigenous-rights approach has been proposed to curb  
46  
47 285 rheumatic heart disease among Indigenous people in Canada, Australia and New Zealand.(39)

48  
49 286 Lastly, including *B. quintana* among the list of nationally and provincially notifiable diseases  
50  
51 287 could serve as a flagship diagnosis to reflect the state of housing accessibility in Canada.(26)

52  
53  
54  
55  
56  
57  
58  
59  
60

1  
2  
3 288  
4  
5 289 Our study is limited by its retrospective nature and the limitations of serology. All cases  
6  
7  
8 290 described here were a consequence of a provider ordering testing for an under-recognized  
9  
10 291 disease. As most healthcare providers rarely if ever think about *Bartonella*, this study does not  
11  
12 292 describe the true burden of *Bartonella* infection in Manitoba. The study is further limited by the  
13  
14 293 known cross-reactivity of *Bartonella* serology between different *Bartonella* species and other  
15  
16 294 infectious pathogens, albeit at lower titers.(40) Furthermore, occasional cases of *Bartonella*  
17  
18 295 bacteremia and endocarditis have been associated with negative *Bartonella* serology despite  
19  
20  
21 296 molecular confirmation of *Bartonella*.(13)  
22  
23

24 297

25  
26 298 Conclusion:

27  
28 299 The emergence of *B. quintana* in urban and rural Manitoba indicates the need for improved  
29  
30  
31 300 access to suitable housing and running water, both within inner-city Winnipeg as well as in rural  
32  
33 301 Manitoban communities. Improved case finding with seroprevalence studies and subsequent  
34  
35 302 echocardiographic surveillance for individuals with elevated titers is needed to prevent  
36  
37 303 endovascular complications as endocarditis and mycotic aneurysm rupture.  
38  
39

40 304

41  
42 305  
43  
44  
45  
46  
47  
48  
49  
50  
51  
52  
53  
54  
55  
56  
57  
58  
59  
60

1  
2  
3 306 **References:**  
4

- 5 307 1. Foucault C, Brouqui P, Raoult D. *Bartonella quintana* Characteristics and  
6  
7 308 Clinical Management. *Emerg Infect Dis J* [Internet]. 2006;12(2):217. Available from:  
9  
10 309 <http://wwwnc.cdc.gov/eid/article/12/2/05-0874>  
11  
12  
13 310 2. Okaro U, Addisu A, Casanas B, Anderson B. *Bartonella* Species, an Emerging Cause of  
14  
15 311 Blood-Culture-Negative Endocarditis. *Clin Microbiol Rev.* 2017;30(3):709–46.  
16  
17  
18 312 3. La Scola B, Raoult D. Culture of *Bartonella quintana* and *Bartonella henselae* from human  
19  
20 313 samples: a 5-year experience (1993 to 1998). *J Clin Microbiol* [Internet]. 1999  
21  
22 314 Jun;37(6):1899–905. Available from: <https://pubmed.ncbi.nlm.nih.gov/10325344>  
23  
24  
25 315 4. Lynch T, Iverson J, Kosoy M. Combining culture techniques for *Bartonella*: the best of  
26  
27 316 both worlds. *J Clin Microbiol* [Internet]. 2011/02/02. 2011 Apr;49(4):1363–8. Available  
28  
29 317 from: <https://pubmed.ncbi.nlm.nih.gov/21289156>  
30  
31  
32 318 5. Engel P, Salzburger W, Liesch M, Chang C-C, Maruyama S, Lanz C, et al. Parallel  
33  
34 319 Evolution of a Type IV Secretion System in Radiating Lineages of the Host-Restricted  
35  
36 320 Bacterial Pathogen *Bartonella*. *PLOS Genet* [Internet]. 2011 Feb 10;7(2):e1001296.  
37  
38 321 Available from: <https://doi.org/10.1371/journal.pgen.1001296>  
39  
40  
41 42  
43 322 6. Koehler JE, Glaser CA, Tappero JW. *Rochalimaea henselae* Infection: A New Zoonosis  
44  
45 323 With the Domestic Cat as Reservoir. *JAMA* [Internet]. 1994 Feb 16;271(7):531–5.  
46  
47 324 Available from: <https://doi.org/10.1001/jama.1994.03510310061039>  
48  
49  
50 325 7. Florin TA, Zaoutis TE, Zaoutis LB. Beyond Cat Scratch Disease: Widening Spectrum of  
51  
52 326 *Bartonella henselae* Infection. *Pediatrics* [Internet]. 2008 May  
53  
54 327 1;121(5):e1413 LP-e1425. Available from:



- 1  
2  
3 328 <http://pediatrics.aappublications.org/content/121/5/e1413.abstract>  
4  
5  
6 329 8. Leibler JH, Zakhour CM, Gadhoke P, Gaeta JM. Zoonotic and Vector-Borne Infections  
7  
8 330 Among Urban Homeless and Marginalized People in the United States and Europe, 1990–  
9  
10 331 2014. *Vector-Borne Zoonotic Dis* [Internet]. 2016 May 9;16(7):435–44. Available from:  
12  
13 332 <https://doi.org/10.1089/vbz.2015.1863>  
14  
15  
16 333 9. Raoult D, Foucault C, Brouqui P. Infections in the homeless. *Lancet Infect Dis* [Internet].  
17  
18 334 2001;1(2):77–84. Available from:  
19  
20 335 <http://www.sciencedirect.com/science/article/pii/S1473309901000627>  
22  
23 336 10. Doumbo O, Raoult D. Management and Treatment of Human Lice. *Biomed Res Int*.  
24  
25 337 2016;2016.  
26  
27  
28 338 11. Graham JHP. A NOTE ON A RELAPSING FEBRILE ILLNESS OF UNKNOWN  
29  
30 339 ORIGIN. *Lancet* [Internet]. 1915;186(4804):703–4. Available from:  
31  
32 340 <https://www.sciencedirect.com/science/article/pii/S0140673601536922>  
33  
34  
35  
36 341 12. JA C, Flynn C, RL R, Vlahov D, JE C. Antibodies to bartonella species in inner-city  
37  
38 342 intravenous drug users in baltimore, md. *Arch Intern Med* [Internet]. 1996 Nov  
39  
40 343 25;156(21):2491–5. Available from:  
41  
42 344 <http://dx.doi.org/10.1001/archinte.1996.00440200111014>  
43  
44  
45  
46 345 13. Foucault C, Barrau K, Brouqui P, Raoult D. Bartonella quintana Bacteremia among  
47  
48 346 Homeless People. *Clin Infect Dis* [Internet]. 2002 Sep 15;35(6):684–9. Available from:  
49  
50 347 <http://dx.doi.org/10.1086/342065>  
51  
52  
53  
54 348 14. Brouqui P, Houpiqian P, Dupont HT, Toubiana P, Obadia Y, Lafay V, et al. Survey of the  
55  
56  
57  
58  
59  
60

- 1  
2  
3 349 Seroprevalence of Bartonella quintana in Homeless People. Clin Infect Dis [Internet].  
4  
5 350 1996 Oct 1;23(4):756–9. Available from: <http://dx.doi.org/10.1093/clinids/23.4.756>  
6  
7  
8 351 15. Ohl ME, Spach DH. Bartonella quintana and Urban Trench Fever. Clin Infect Dis  
9  
10 352 [Internet]. 2000 Jul 1;31(1):131–5. Available from: <http://dx.doi.org/10.1086/313890>  
11  
12  
13 353 16. Edouard S, Nabet C, Lepidi H, Fournier P-E, Raoult D. Bartonella, a common cause of  
14  
15 354 endocarditis: a report on 106 cases and review. J Clin Microbiol [Internet]. 2014/12/24.  
16  
17 355 2015 Mar;53(3):824–9. Available from: <https://pubmed.ncbi.nlm.nih.gov/25540398>  
18  
19  
20  
21 356 17. Luciani L, El Baroudi Y, Prudent E, Raoult D, Fournier P-E. Bartonella infections  
22  
23 357 diagnosed in the French reference center, 2014–2019, and focus on infections in the  
24  
25 358 immunocompromised. Eur J Clin Microbiol Infect Dis [Internet]. 2021; Available from:  
26  
27 359 <https://doi.org/10.1007/s10096-021-04244-z>  
28  
29  
30  
31 360 18. Jackson LA, Spaeh DH, Kippen DA, Sugg NK, Regnery RL, Sayers MH, et al.  
32  
33 361 Seroprevalence to Bartonella quintana among Patients at a Community Clinic in  
34  
35 362 Downtown Seattle. J Infect Dis [Internet]. 1996 Apr 1;173(4):1023–6. Available from:  
36  
37 363 <http://dx.doi.org/10.1093/infdis/173.4.1023>  
38  
39  
40  
41 364 19. Cimolai N, Benoit L, Hill A, Lyons C. Bartonella henselae infection in British Columbia:  
42  
43 365 Evidence for an endemic disease among humans. Can J Microbiol [Internet]. 2000 Oct  
44  
45 366 1;46(10):908–12. Available from: <https://doi.org/10.1139/w00-074>  
46  
47  
48 367 20. Kleinman DR, Lam JC, Bacani J, Tyrrell G, Turvey SL. Bartonella quintana infective  
49  
50 368 endocarditis in northern Alberta: A case report. Off J Assoc Med Microbiol Infect Dis  
51  
52 369 Canada [Internet]. 2020 Dec 1;5(4):256–60. Available from:  
53  
54 370 <https://doi.org/10.3138/jammi-2020-0013>  
55  
56  
57  
58  
59  
60

- 1  
2  
3 371 21. Lam JC, Fonseca K, Pabbaraju K, Meatherall BL. Case Report: Bartonella quintana  
4  
5 372 Endocarditis Outside of the Europe–African Gradient: Comprehensive Review of Cases  
6  
7 373 within North America. *Am J Trop Med Hyg* [Internet]. 2019;100(5):1125–9. Available  
8  
9 374 from: <http://www.ajtmh.org/content/journals/10.4269/ajtmh.18-0929>  
10  
11  
12  
13 375 22. Boodman C, Wuerz T, Lagacé-Wiens P. Endocarditis due to &lt;em>Bartonella  
14  
15 376 quintana&lt;/em>, the etiological agent of trench fever. *Can Med Assoc J* [Internet].  
16  
17 377 2020 Dec 7;192(49):E1723 LP-E1726. Available from:  
18  
19 378 <http://www.cmaj.ca/content/192/49/E1723.abstract>  
20  
21  
22  
23 379 23. Raoult D, PE F, Drancourt M, al et. DIagnosis of 22 new cases of bartonella endocarditis.  
24  
25 380 *Ann Intern Med* [Internet]. 1996 Oct 15;125(8):646–52. Available from:  
26  
27 381 <http://dx.doi.org/10.7326/0003-4819-125-8-199610150-00004>  
28  
29  
30 382 24. Keynan Y, Mackenzie L, Lagacé-Wiens P. Quintessential Culture-Negative Endocarditis.  
31  
32 383 *Can J Cardiol*. 2016;32(3):395.e9-395.e10.  
33  
34  
35  
36 384 25. Spach DH, Kanter AS, Dougherty MJ, Larson AM, Coyle MB, Brenner DJ, et al.  
37  
38 385 *Bartonella* (*Rochalimaea*) *quintana* Bacteremia in Inner-City Patients with Chronic  
39  
40 386 Alcoholism. *N Engl J Med*. 1995;332(7):424–8.  
41  
42  
43 387 26. Public Health Agency of Canada. Case definitions: Nationally notifiable diseases  
44  
45 388 [Internet]. Government of Canada. 2021 [cited 2021 Jun 13]. Available from:  
46  
47 389 [diseases.canada.ca/notifiable/diseases-list](https://diseases.canada.ca/notifiable/diseases-list)  
48  
49  
50  
51 390 27. FOCUS Diagnostics. Bartonella IFA IgG (Package insert) [Internet]. Cypress, California;  
52  
53 391 2011. Available from: <https://www.focusdx.com/pdfs/pi/OUS/IF1300G-OUS.pdf>  
54  
55  
56  
57  
58  
59  
60

- 1  
2  
3 392 28. Dalton MJ, Robinson LE, Cooper J, Regnery RL, Olson JG, Childs JE. Use of Bartonella  
4  
5 393 Antigens for Serologic Diagnosis of Cat-scratch Disease at a National Referral Center.  
6  
7 394 Arch Intern Med [Internet]. 1995 Aug 7;155(15):1670–6. Available from:  
8  
9  
10 395 <https://doi.org/10.1001/archinte.1995.00430150164017>  
11  
12  
13 396 29. Centers for Disease Control and Prevention. Case definitions for infectious conditions  
14  
15 397 under public health surveillance. Morb Mortal Wkly Rep (MMWR)- Centers Dis Control  
16  
17 398 Prev. 1997;46(RR-10):1–55.  
19  
20 399 30. FOURNIER P-E, LELIEVRE H, EYKYN SJ, MAINARDI J-L, MARRIE TJ, BRUNEEL  
21  
22 400 F, et al. Epidemiologic and Clinical Characteristics of Bartonella quintana and Bartonella  
23  
24 401 henselae Endocarditis: A Study of 48 Patients. Medicine (Baltimore) [Internet].  
25  
26 402 2001;80(4). Available from: [https://journals.lww.com/md-](https://journals.lww.com/md-journal/Fulltext/2001/07000/Epidemiologic_and_Clinical_Characteristics_of.3.aspx)  
27  
28 403 [journal/Fulltext/2001/07000/Epidemiologic\\_and\\_Clinical\\_Characteristics\\_of.3.aspx](https://journals.lww.com/md-journal/Fulltext/2001/07000/Epidemiologic_and_Clinical_Characteristics_of.3.aspx)  
29  
30 404 31. Deegan CLA, Bonnycastle MM. Displacement, Housing and Homelessness in Northern  
31  
32 405 Manitoba Communities [Internet]. Winnipeg-Manitoba; 2020. Available from:  
33  
34 406 <https://www.policyalternatives.ca/sites/default/files/uploads/publications/Manitoba>  
35  
36 407 [Office/2020/11/Northern Homelessness.pdf](https://www.policyalternatives.ca/sites/default/files/uploads/publications/Manitoba)  
37  
38  
39 408 32. McLeod AI. Kendall rank correlation and Mann-Kendall trend test [Internet]. 2015 [cited  
40  
41 409 2021 Jun 20]. Available from: [https://cran.r-](https://cran.r-project.org/web/packages/Kendall/Kendall.pdf)  
42  
43 410 [project.org/web/packages/Kendall/Kendall.pdf](https://cran.r-project.org/web/packages/Kendall/Kendall.pdf)  
44  
45  
46 411 33. Statistics Canada. Housing Suitability. Dictionary, Census of Population, 2016. 2017.  
47  
48  
49 412 34. Ghidey FY, Igbinosa O, Mills K, Lai L, Woods C, Ruiz ME, et al. Case series of  
50  
51 413 Bartonella quintana blood culture-negative endocarditis in Washington, DC. JMM Case  
52  
53  
54  
55  
56  
57  
58  
59  
60

- 1  
2  
3 414 Reports [Internet]. 2016 Aug 30;3(4):e005049. Available from:  
4  
5 415 <http://www.ncbi.nlm.nih.gov/pmc/articles/PMC5330240/>  
6  
7  
8 416 35. Raoult D, Fournier P-E, Vandenesch F, Mainardi J-L, Eykyn SJ, Nash J, et al. Outcome  
9  
10 and Treatment of Bartonella Endocarditis. Arch Intern Med [Internet]. 2003 Jan  
11 417  
12 27;163(2):226–30. Available from: <https://doi.org/10.1001/archinte.163.2.226>  
13 418  
14  
15  
16 419 36. Barbier F, Fournier P-E, Dauge M-C, Gallien S, Raoult D, Andremont A, et al. Bartonella  
17  
18 quintana Coinfection in Staphylococcus aureus Endocarditis: Usefulness of Screening in  
19 420  
20 High-Risk Patients? Clin Infect Dis [Internet]. 2009 May 1;48(9):1332–3. Available from:  
21 421  
22 <https://doi.org/10.1086/597826>  
23 422  
24  
25  
26 423 37. Gaetz S, Dej E, Richter T, Redman M. The State of Homelessness in Canada 2016.  
27  
28 424 Toronto, ON; 2016.  
29  
30  
31 425 38. Singer M, Bulled N, Ostrach B, Mendenhall E. Syndemics and the biosocial conception of  
32  
33 health. Lancet [Internet]. 2017 Mar 4;389(10072):941–50. Available from:  
34 426  
35 [https://doi.org/10.1016/S0140-6736\(17\)30003-X](https://doi.org/10.1016/S0140-6736(17)30003-X)  
36 427  
37  
38  
39 428 39. Wyber R, Wade V, Anderson A, Schreiber Y, Saginur R, Brown A, et al. Rheumatic heart  
40  
41 429 disease in Indigenous young peoples. Lancet Child Adolesc Heal [Internet]. 2021 Jun  
42  
43 430 1;5(6):437–46. Available from: [https://doi.org/10.1016/S2352-4642\(20\)30308-4](https://doi.org/10.1016/S2352-4642(20)30308-4)  
44  
45  
46 431 40. La Scola B, Raoult D. Serological cross-reactions between Bartonella quintana, Bartonella  
47  
48 henselae, and Coxiella burnetii. J Clin Microbiol [Internet]. 1996 Sep;34(9):2270–4.  
49 432  
50 Available from: <https://pubmed.ncbi.nlm.nih.gov/8862597>  
51 433  
52  
53  
54 434

435

Confidential

1  
2  
3  
4  
5  
6  
7  
8  
9  
10  
11  
12  
13  
14  
15  
16  
17  
18  
19  
20  
21  
22  
23  
24  
25  
26  
27  
28  
29  
30  
31  
32  
33  
34  
35  
36  
37  
38  
39  
40  
41  
42  
43  
44  
45  
46  
47  
48  
49  
50  
51  
52  
53  
54  
55  
56  
57  
58  
59  
60

1  
2  
3  
4  
5  
6  
7  
8  
9  
10  
11  
12  
13  
14  
15  
16  
17  
18  
19  
20  
21  
22  
23  
24  
25  
26  
27  
28  
29  
30  
31  
32  
33  
34  
35  
36  
37  
38  
39  
40  
41  
42  
43  
44  
45  
46  
47  
48  
49  
50  
51  
52  
53  
54  
55  
56  
57  
58  
59  
60

436 **Tables 1 and 2.**

437 Please see tables attached separately.

Confidential

1  
2  
3 438 **Caption Table 2.**  
4

5 439 AV: aortic valve, MV: mitral valve, PV: pulmonary valve, AKI: acute kidney injury, CRRT:  
6  
7 440 continuous renal replacement therapy, HIV: Human Immunodeficiency Virus, IV: intravenous,  
8  
9 441 CM: crystal methamphetamine, MCA: middle cerebral artery, MB: Manitoba, AMA: against  
10  
11 442 medical advice, GERD: gastro-esophageal reflux disease, SRO: single room occupancy, MRSA:  
12  
13 443 methicillin-susceptible staphylococcus aureus, BHA: bilateral hip arthroplasty, VL: viral load,  
14  
15 444 HCV: hepatitis C virus, AVR: aortic valve replacement, NU: Nunavut, T2DM: type 2 diabetes  
16  
17  
18  
19 445 mellitus  
20  
21  
22 446  
23  
24  
25  
26  
27  
28  
29  
30  
31  
32  
33  
34  
35  
36  
37  
38  
39  
40  
41  
42  
43  
44  
45  
46  
47  
48  
49  
50  
51  
52  
53  
54  
55  
56  
57  
58  
59  
60

Confidential



1  
2  
3  
4  
5  
6  
7  
8  
9  
10  
11  
12  
13  
14  
15  
16  
17  
18  
19  
20  
21  
22  
23  
24  
25  
26  
27  
28  
29  
30  
31  
32  
33  
34  
35  
36  
37  
38  
39  
40  
41  
42  
43  
44  
45  
46  
47  
48  
49  
50  
51  
52  
53  
54  
55  
56  
57  
58  
59  
60

447

448 **Figure 1. Legend**

449 Long underwear stained with human blood due to body lice ectoparasitosis acquired in Winnipeg  
450 Canada. Photo courtesy: Dr. Robbin Lindsay.

451

452 **Figure 2. Legend**

453 Body lice, *Pediculus humanus humanus*, seen on clothing acquired from a patient experiencing  
454 homelessness in Winnipeg, Canada. Photo courtesy: Dr. Robbin Lindsay.

455

456

Confidential

1  
2  
3 457 **Figure 1.**  
4  
5

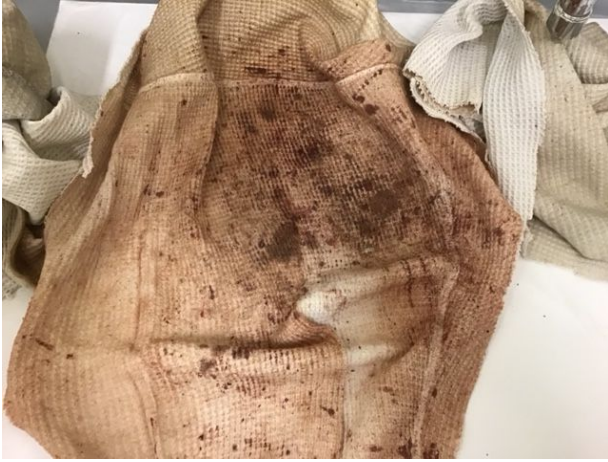

21  
22 459  
23  
24

25 460  
26  
27  
28  
29  
30  
31  
32  
33  
34  
35  
36  
37  
38  
39  
40  
41  
42  
43  
44  
45  
46  
47  
48  
49  
50  
51  
52  
53  
54  
55  
56  
57  
58  
59  
60

Confidential

1  
2  
3  
4  
5  
6  
7  
8  
9  
10  
11  
12  
13  
14  
15  
16  
17  
18  
19  
20  
21  
22  
23  
24  
25  
26  
27  
28  
29  
30  
31  
32  
33  
34  
35  
36  
37  
38  
39  
40  
41  
42  
43  
44  
45  
46  
47  
48  
49  
50  
51  
52  
53  
54  
55  
56  
57  
58  
59  
60

461 **Figure 2.**

462 Please see file attached separately.

463

464

Confidential

Table 1. *Bartonella* serologic testing numbers and percentages in Manitoba from 2010 to 2020

| Year             | 2010          | 2011          | 2012          | 2013          | 2014          | 2015          | 2016          | 2017           | 2018           | 2019           | 2020           | total study period |
|------------------|---------------|---------------|---------------|---------------|---------------|---------------|---------------|----------------|----------------|----------------|----------------|--------------------|
| <b>negative</b>  | 46<br>(90.2%) | 56<br>(83.6%) | 57<br>(86.4%) | 46<br>(97.9%) | 72<br>(93.5%) | 80<br>(82.5%) | 70<br>(80.5%) | 101<br>(91.8%) | 125<br>(89.3%) | 105<br>(91.3%) | 138<br>(87.9%) | 896<br>(88.4%)     |
| <b>equivocal</b> | 5<br>(9.8%)   | 9<br>(13.4%)  | 9<br>(13.6%)  | 0<br>(0.0%)   | 4<br>(5.1%)   | 15<br>(15.5%) | 15<br>(17.2%) | 6<br>(5.5%)    | 13<br>(9.3%)   | 8<br>(7.0%)    | 10<br>(6.4%)   | 94<br>(9.3%)       |
| <b>positive</b>  | 0<br>(0.0%)   | 2<br>(3.0%)   | 0<br>(0.0%)   | 1<br>(2.1%)   | 1<br>(1.3%)   | 2<br>(2.1%)   | 2<br>(2.3%)   | 3<br>(2.7%)    | 2<br>(1.4%)    | 2<br>(1.7%)    | 9<br>(5.7%)    | 24<br>(2.4%)       |
| <b>total</b>     | 51            | 67            | 66            | 47            | 77            | 97            | 87            | 110            | 140            | 115            | 157            | 1014               |

| Number | Age | Gender | area        | year | <i>B. henselae</i> titer | <i>B. quintana</i> titer |
|--------|-----|--------|-------------|------|--------------------------|--------------------------|
| 1      | 48  | M      | Winnipeg    | 2020 | 8192                     | 8192                     |
| 2      | 35  | M      | Island lake | 2020 | 8192                     | 8192                     |
| 3      | 33  | M      | Island lake | 2020 | 8192                     | 8192                     |
| 4      | 53  | M      | Winnipeg    | 2020 | 8192                     | 8192                     |
| 5      | 62  | M      | Winnipeg    | 2020 | 8192                     | 8192                     |
| 6      | 57  | M      | Winnipeg    | 2020 | 512                      | 256                      |
| 7      | 63  | M      | Winnipeg    | 2020 | 64                       | 256                      |
| 8      | 65  | M      | Winnipeg    | 2020 | 256                      | negative                 |
| 9      | 63  | M      | Winnipeg    | 2020 | 64                       | 256                      |
| 10     | 38  | F      | Winnipeg    | 2019 | 256                      | negative                 |
| 11     | 31  | F      | Winnipeg    | 2018 | 8192                     | 8192                     |
| 12     | 39  | M      | Winnipeg    | 2017 | 1024                     | 512                      |
| 13     | 20  | F      | Winnipeg    | 2017 | 512                      | n/a                      |
| 14     | 53  | M      | Winnipeg    | 2017 | 4096                     | 2048                     |
| 15     | 47  | M      | Baker Lake  | 2015 | 4096                     | n/a                      |
| 16     | 62  | F      | Pukatawagan | 2014 | 1024                     | n/a                      |

| molecular speciation                      | clinical presentation                                                                                                                                             | Emboolic complications | documented endovascular infection                      |
|-------------------------------------------|-------------------------------------------------------------------------------------------------------------------------------------------------------------------|------------------------|--------------------------------------------------------|
| 16S rRNA aortic valve: <i>B. quintana</i> | culture-negative AV and MV endocarditis, aortic root abscess, AKI (CRRT), pulmonary embolization, splenic infarcts, aneurysms of abdominal aortic branches.       | Yes                    | Yes (largest vegetation: 14 x 6 mm)                    |
| No                                        | culture negative MV endocarditis, ruptured intracranial mycotic aneurysm (hemorrhage)                                                                             | Yes                    | Yes (largest vegetation MV: 18x7 mm)                   |
| No                                        | culture negative MV endocarditis and ruptured intracranial mycotic aneurysm                                                                                       | Yes                    | Yes (largest vegetation: 16x9mm)                       |
| No                                        | culture-negative AV and MV endocarditis, AKI (CRRT), intracranial emboli, concomitant <i>Streptococcus pneumoniae</i> bacteremia                                  | Yes                    | Yes (largest vegetation: 14x6mm)                       |
| 16S rRNA aortic valve: <i>B. quintana</i> | culture-negative MV endocarditis, splenic infarct                                                                                                                 | Yes                    | Yes (largest vegetation: 21x6mm)                       |
| No                                        | ectoparasitosis, cellulitis                                                                                                                                       | No                     | No. No echocardiography performed.                     |
| No                                        | malaise, rash, ectoparasitosis                                                                                                                                    | No                     | No. No echocardiography performed.                     |
| No                                        | gastroduodenal artery mycotic aneurysm rupture (hemorrhagic shock)                                                                                                | No                     | Yes (gastroduodenal artery aneurysm: unclear etiology) |
| No                                        | rash evidence of body lice (treated with permethrin), presentation to emergency room with shin pain (no                                                           | No                     | No. No echocardiography performed.                     |
| No                                        | pulmonary valve endocarditis                                                                                                                                      | No                     | Yes. (vegetation size not retrievable).                |
| 16S rRNA aortic valve: <i>B. quintana</i> | AV and PV endocarditis, splenic infarcts, anemia                                                                                                                  | Yes                    | Yes. (vegetation size not retrievable).                |
| No                                        | axillary lymphadenopathy and fever                                                                                                                                | No                     | No.                                                    |
| No                                        | axillary lymphadenopathy and fever                                                                                                                                | No                     | No.                                                    |
| No                                        | culture-negative endocarditis (unclear valve by available documentation)                                                                                          | No                     | Yes. (vegetation size not retrievable).                |
| rpoB gene sequencing: <i>B. quintana</i>  | endocarditis (AV, MV, PV), intracranial aneurysm ruptured, intracranial hemorrhage, anemia                                                                        | Yes                    | Yes. (vegetation size not retrievable).                |
| 16S rRNA: <i>B. quintana</i>              | endocarditis AV and MV, type A aortic dissection, concomitant <i>Streptococcus pneumoniae</i> bacteremia and endocarditis: gram positive cocci on explanted valve | No                     | Yes. (vegetation size not retrievable).                |

| antimicrobial therapy                                                  | surgical treatment                                                                        | comorbidities                                                              | Pre-existing valvular disease | substance use                                                                               | housing                                                 |
|------------------------------------------------------------------------|-------------------------------------------------------------------------------------------|----------------------------------------------------------------------------|-------------------------------|---------------------------------------------------------------------------------------------|---------------------------------------------------------|
| gentamicin (4d), ceftriaxone (42d), doxycycline (42d)                  | AV and MV valve replacement                                                               | HIV (CD4=94, VL=<20), solitary kidney, ectoparasitosis                     | No                            | alcohol (binge, active), IV CM (remission)                                                  | supportive housing, previous homelessness               |
| ceftriaxone (43d), vancomycin (21d), daptomycin (22d)                  | endovascular coiling of MCA aneurysm                                                      | rheumatic heart disease, schizophrenia, previous ectoparasitosis           | Yes                           | occasional alcohol, smoked cannabis                                                         | housed with family in remote community, limited running |
| ceftriaxone(56d), vancomycin (56d), doxycycline(56d), gentamicin (14d) | endovascular coiling of MCA aneurysm                                                      | anxiety, depression                                                        | No                            | IV CM (daily, active), alcohol                                                              | homeless, recent incarceration, previous housing in     |
| ceftriaxone (15d), vancomycin (15d)                                    | No (declined, AMA).                                                                       | GERD                                                                       | No                            | daily alcohol, baclofen                                                                     | underhoused (SRO), meals and clothing at shelter        |
| gentamicin (14d), doxycycline (42d)                                    | MV replacement                                                                            | hypertension, dyslipidemia, depression, previous ectoparasitosis           | No                            | alcohol                                                                                     | supportive housing (clothes, food at shelter)           |
| Doxycycline (7d: MRSA cellulitis)                                      | None.                                                                                     | HIV (CD4=322, VL<20 copies/mL), HCV (untreated), BHA, orthopedic fractures | No                            | alcohol (active), IV CM (remission)                                                         | homeless                                                |
| None.                                                                  | None.                                                                                     | Anxiety                                                                    | No                            | unknown                                                                                     | underhoused (current SRO, previously homeless)          |
| Pen G and ceftriaxone (total 14d, neurosyphilis)                       | embolization gastroduodenal artery                                                        | neurosyphilis, Hep C                                                       | No                            | unknown                                                                                     | Housed.                                                 |
| None.                                                                  | None.                                                                                     | Unknown.                                                                   | No                            | Unknown.                                                                                    | homeless (shelter)                                      |
| No dedicated <i>Bartonella</i> treatment (left AMA).                   | None                                                                                      | HIV (CD4=300, VL<20), Hep C, TB                                            | No                            | polysubstance use with IV CM (admissions with meth induced psychosis), intermittent alcohol | housed                                                  |
| gentamicin 14 days and doxycycline 6 weeks post-AVR                    | bioprosthetic AVR and PDA closure                                                         | congenital patent ductus arteriosus                                        | Yes                           | none                                                                                        | housed                                                  |
| azithromycin (5d)                                                      | none                                                                                      | nephrolithiasis                                                            | No                            | alcohol                                                                                     | housed                                                  |
| azithromycin (5d)                                                      | none                                                                                      | none.                                                                      | No                            | none.                                                                                       | housed                                                  |
| doxycycline (42d) and rifampin(14d)                                    | bioprosthetic AV replacement                                                              | neuroendocrine tumor, PE, CAD, HTN                                         | No                            | none                                                                                        | housed                                                  |
| ceftriaxone (42d), doxycycline (42d), gentamicin (initial 14d)         | bioprosthetic AVR, MVR, PV repair, craniotomy, intracranial hematoma evacuation, aneurysm | not documented                                                             | No                            | alcohol                                                                                     | housed (remote community)                               |
| ceftriaxone (42d post-AVR/MVR), doxycycline (42d post AVR/MVR)         | bioprosthetic AVR, MVR                                                                    | HTN, T2DM, DLP                                                             | No                            | Alcohol                                                                                     | housed (remote, no running water)                       |

| animal exposure         | outcome                      | geographic acquisition | interpretation                         |
|-------------------------|------------------------------|------------------------|----------------------------------------|
| none                    | survived (1 year follow-up)  | local urban            | confirmed <i>B. quintana</i>           |
| none                    | survived (6 month follow-up) | rural MB               | probable <i>B. quintana</i>            |
| none                    | survived (6 month follow-up) | rural MB               | probable <i>B. quintana</i>            |
| none                    | deceased                     | local urban            | probable <i>B. quintana</i>            |
| none                    | survived (3 month follow-up) | local urban            | confirmed <i>B. quintana</i>           |
| none                    | survived (no follow-up)      | local urban            | probable <i>B. quintana</i>            |
| none                    | survived (no follow-up)      | local urban            | probable <i>B. quintana</i>            |
| None.                   | survived (no follow-up)      | local urban            | not a case (suspected false positive). |
| None.                   | survived (no follow-up)      | local urban            | probable <i>B. quintana</i>            |
| cat (recent scratch)    | survived (no follow-up)      | local urban            | probable <i>B. henselae</i>            |
| none                    | survived (1 year follow-up)  | Eritrea (via Ukraine)  | confirmed <i>B. quintana</i>           |
| cat (recent scratch)    | survived (no follow-up)      | Bosnia                 | probable <i>B. henselae</i>            |
| cat (recent scratch)    | survived (no follow-up)      | Thailand               | probable <i>B. henselae</i>            |
| cats (previous scratch) | survived (6 month follow-up) | local urban            | probable <i>B. henselae</i>            |
| none.                   | deceased                     | rural NU               | confirmed <i>B. quintana</i>           |
| subsistence hunting.    | survived (6 month follow-up) | Rural MB               | confirmed <i>B. quintana</i>           |



1  
2  
3  
4  
5  
6  
7  
8  
9  
10  
11  
12  
13  
14  
15  
16  
17  
18  
19  
20  
21  
22  
23  
24  
25  
26  
27  
28  
29  
30  
31  
32  
33  
34  
35  
36  
37  
38  
39  
40  
41  
42  
43  
44  
45  
46  
47  
48  
49  
50  
51  
52  
53  
54  
55  
56  
57  
58  
59  
60

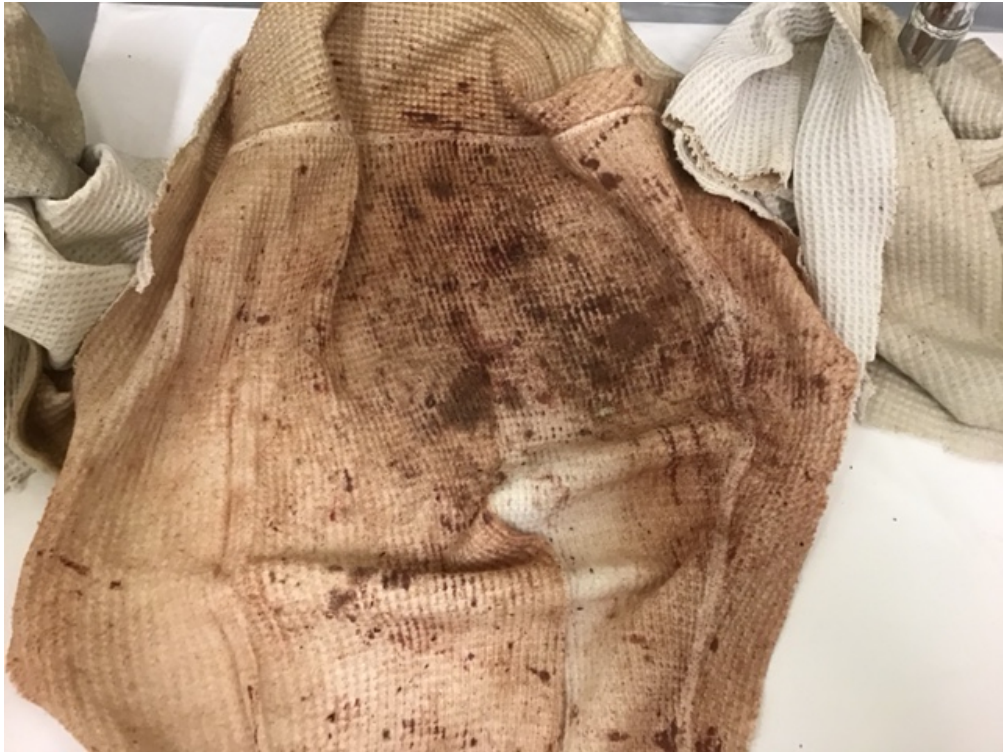

Long underwear stained with human blood due to body lice ectoparasitosis acquired in Winnipeg Canada.  
Photo courtesy: Dr. Robbin Lindsay.

1  
2  
3  
4  
5  
6  
7  
8  
9  
10  
11  
12  
13  
14  
15  
16  
17  
18  
19  
20  
21  
22  
23  
24  
25  
26  
27  
28  
29  
30  
31  
32  
33  
34  
35  
36  
37  
38  
39  
40  
41  
42  
43  
44  
45  
46  
47  
48  
49  
50  
51  
52  
53  
54  
55  
56  
57  
58  
59  
60

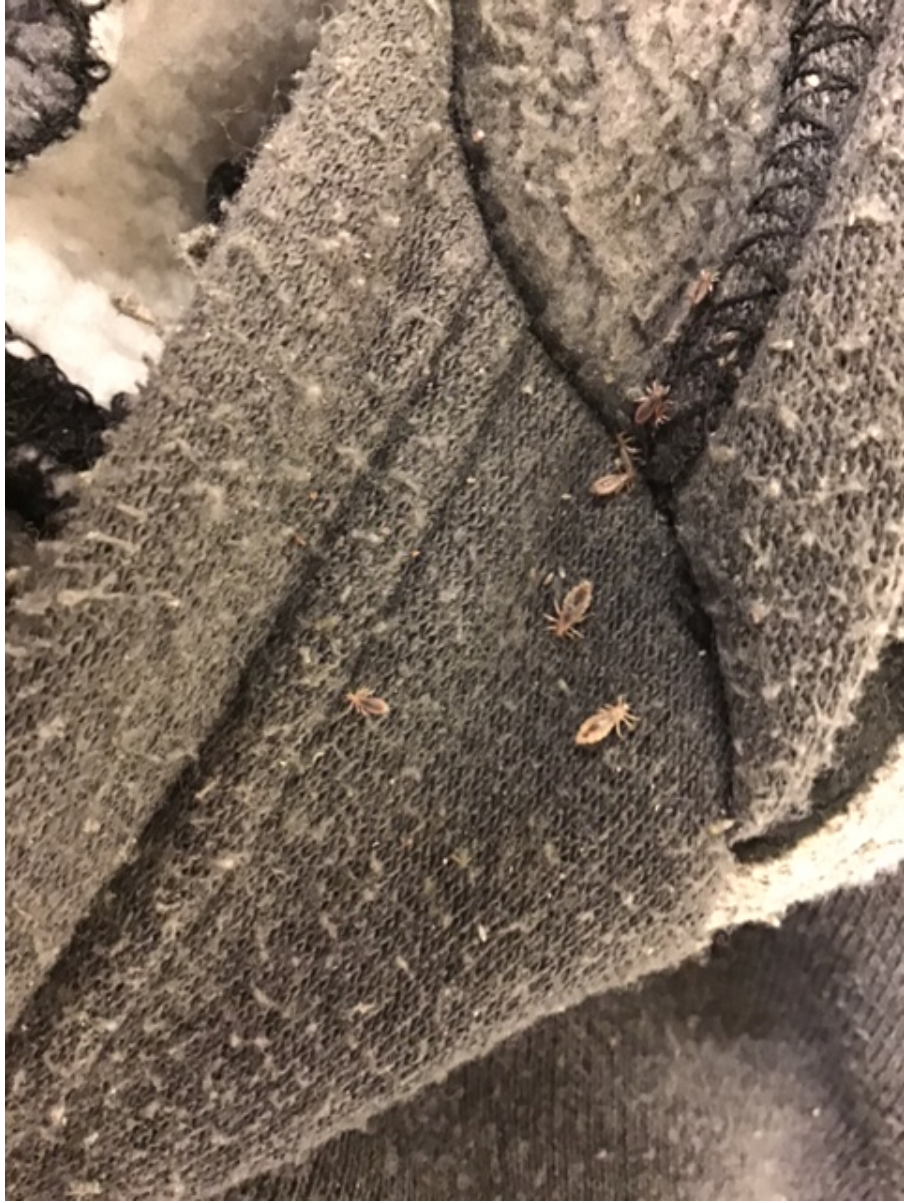

Body lice, *Pediculus humanus humanus*, seen on clothing acquired from a patient experiencing homelessness in Winnipeg, Canada. Photo courtesy: Dr. Robbin Lindsay.

| Number | Age | Gender | area          | year | <i>B. henselae</i> titer | <i>B. quintana</i> titer | clinical presentation                                                                               |
|--------|-----|--------|---------------|------|--------------------------|--------------------------|-----------------------------------------------------------------------------------------------------|
| 1      | 25  | F      | Winnipeg      | 2020 | 64                       | 64                       | Culture-negative AV endocarditis<br>AV, anemia                                                      |
| 2      | 52  | F      | Island Lake   | 2020 | 64                       | 64                       | rash                                                                                                |
| 3      | 71  | M      | Winnipeg      | 2020 | 64                       | 64                       | CN IE AV, bioprosthetic<br>AVR/hemiarch replacement                                                 |
| 4      | 43  | F      | Winnipeg      | 2020 | 128                      | 0                        | visual changes                                                                                      |
| 5      | 58  | M      | Swan River    | 2019 | 64                       | 64                       | visual changes                                                                                      |
| 6      | 50  | F      | Oxford House  | 2019 | 64                       | 64                       | visual changes                                                                                      |
| 7      | 45  | M      | Norway House  | 2019 | 64                       | 64                       | visual changes                                                                                      |
| 8      | 67  | M      | Lynn Lake     | 2019 | 128                      | 64                       | CN MV IE, hemorrhagic stroke,<br>splenic infarct, R colic branch<br>artery aneurysm                 |
| 9      | 45  | F      | St. Andrews   | 2018 | 64                       | 64                       | no data                                                                                             |
| 10     | 71  | M      | Dauphin       | 2018 | 64                       | 64                       | no data                                                                                             |
| 11     | 39  | M      | Winnipeg      | 2018 | 64                       | 128                      | axillary lymphadenopathy                                                                            |
| 12     | 21  | M      | Winkler       | 2018 | 64                       | n/a                      | no data                                                                                             |
| 13     | 32  | M      | Hudson        | 2018 | 64                       | n/a                      | lymphadenopathy (positive<br>pathology stain for <i>Bartonella</i> )                                |
| 14     | 82  | F      | Winnipeg      | 2018 | 128                      | n/a                      | no data                                                                                             |
| 15     | 83  | M      | Winnipeg      | 2016 | 64                       | n/a                      | fever NYD                                                                                           |
| 16     | 55  | F      | The Pas       | 2016 | 64                       | n/a                      | no data                                                                                             |
| 17     | 54  | M      | Winnipeg      | 2016 | 128                      | n/a                      | visual changes                                                                                      |
| 18     | 31  | F      | Winnipeg      | 2016 | 128                      | n/a                      | visual changes                                                                                      |
| 19     | 30  | M      | Winnipeg      | 2016 | 128                      | n/a                      | visual changes                                                                                      |
| 20     | 26  | F      | Steinbach     | 2016 | 64                       | n/a                      | visual changes                                                                                      |
| 21     | 29  | F      | Winnipeg      | 2016 | 64                       | n/a                      | visual changes                                                                                      |
| 22     | 69  | M      | Winnipeg      | 2016 | 128                      | n/a                      | Q fever aortic valve endocarditis,<br>ruptured infected aortic aneurysm<br>(abdominal aorta repair) |
| 23     | 46  | M      | Arviat        | 2016 | 125                      | n/a                      | visual changes                                                                                      |
| 24     | 54  | M      | Selkirk       | 2015 | 64                       | n/a                      | lymphadenopathy (cervical)                                                                          |
| 25     | 46  | M      | Winnipeg      | 2015 | 64                       | n/a                      | visual changes                                                                                      |
| 26     | 28  | M      | Winnipeg      | 2015 | 64                       | n/a                      | visual changes                                                                                      |
| 27     | 18  | M      | East St. Paul | 2015 | 64                       | n/a                      | visual changes                                                                                      |

|    |    |   |                |      |     |     |                                              |
|----|----|---|----------------|------|-----|-----|----------------------------------------------|
| 28 | 45 | F | Winnipeg       | 2015 | 64  | n/a | no data                                      |
| 29 | 53 | F | Winnipeg       | 2015 | 64  | n/a | no data                                      |
| 30 | 55 | F | Winnipeg       | 2015 | 64  | n/a | hematochezia                                 |
| 31 | 34 | F | Winnipeg       | 2014 | 64  | n/a | rash                                         |
| 32 | 18 | F | Winnipeg       | 2012 | 64  | n/a | no data                                      |
| 33 | 68 | M | Warren         | 2012 | 64  | n/a | visual changes                               |
| 34 | 49 | M | Island Lake    | 2012 | 128 | n/a | no data                                      |
| 35 | 57 | F | Gilbert Plains | 2011 | 64  | n/a | no data                                      |
| 36 | 64 | F | Winnipeg       | 2011 | 64  | n/a | no data                                      |
| 37 | 27 | F | Winnipeg       | 2011 | 64  | n/a | rash and fever (diagnosed with Lyme disease) |
| 38 | 56 | M | Winnipeg       | 2010 | 64  | n/a | cervical lymphadenopathy                     |

Confidential

| documented endovascular infection            | antimicrobial therapy                                                                                            | comorbidities/ co-infection                                     | substance use                   | housing                 | animal exposure                                       |
|----------------------------------------------|------------------------------------------------------------------------------------------------------------------|-----------------------------------------------------------------|---------------------------------|-------------------------|-------------------------------------------------------|
| Yes. (AV 2 x 9 mm)                           | ceftriaxone (21d), vancomycin (21d), doxycycline (21d), then AMA                                                 | unknown                                                         | IV opiate use disorder          | homeless                | none                                                  |
| no                                           | none                                                                                                             | IgA nephropathy, ESRD on HD                                     | none                            | housed remote community | none                                                  |
| Yes (AV IE and abscess)                      | ceftriaxone (42d)                                                                                                | DLH, HTN, GIB, hypothyroidism                                   | alcohol                         | housed                  | dog                                                   |
| no                                           | ceftriaxone (14d)                                                                                                | neurosyphilis, PTSD, depression                                 | polysubstance use disorder with | institutionally housed  | none                                                  |
| no                                           | none                                                                                                             | no data                                                         | alcohol                         | housed                  | unknown                                               |
| no                                           | none                                                                                                             | T2DM, DLP, <i>H. pylori</i> ab IgG positive, syphilis negative. | none                            | housed                  | none                                                  |
| AV fistula embolization in R carotid         | none                                                                                                             | T2DM, DLP, HTN, CAD, NASH cirrhosis                             | none                            | housed                  | unknown                                               |
| Yes (MV IE, intracranial and splenic emboli) | ceftriaxone (3d: premature antimicrobial cessation as MRP team equated "culture negative" with "non-infectious") | HTN, GERD                                                       | alcohol                         | housed                  | unknown                                               |
| no data                                      | no data                                                                                                          | no data                                                         | no data                         | no data                 | no data                                               |
| no data                                      | no data                                                                                                          | no data                                                         | no data                         | no data                 | no data                                               |
| no                                           | TMP-SMX (7d)                                                                                                     | unknown                                                         | alcohol, IV                     | homeless                | unknown                                               |
| no data                                      | no data                                                                                                          | no data                                                         | no data                         | no data                 | no data                                               |
| none.                                        | azithromycin (5d)                                                                                                | ITP and is status post-splenectomy                              | none                            | housed                  | hunter, skins his own animals, domestic cats and dogs |
| no data                                      | no data                                                                                                          | no data                                                         | no data                         | no data                 | no data                                               |
| no data                                      | no data                                                                                                          | CAD, MI, bipolar d/o                                            | no data                         | housed                  | no data                                               |
| no data                                      | no data                                                                                                          | no data                                                         | no data                         | no data                 | no data                                               |
| none.                                        | ceftriaxone (14d)                                                                                                | ocular syphilis (1:16 VDRL), coronary artery                    | no data                         | no data                 | no data                                               |
| no data                                      | no data                                                                                                          | no data                                                         | no data                         | no data                 | no data                                               |
| no data                                      | no data                                                                                                          | no data                                                         | no data                         | no data                 | no data                                               |
| no data                                      | no data                                                                                                          | no data                                                         | no data                         | no data                 | no data                                               |
| no data                                      | no data                                                                                                          | no data                                                         | no data                         | no data                 | no data                                               |
| Yes.                                         | hydroxychloroquine (18m) and doxycycline (18m)                                                                   | none                                                            | none                            | housed                  | none documented                                       |
| none.                                        | syphilis                                                                                                         | unknown                                                         | no data                         | housed                  | unknown                                               |
| no                                           | no data                                                                                                          | no data                                                         | no data                         | no data                 | no data                                               |
| none.                                        | ceftriaxone (14d)                                                                                                | HIV (CD4=540, VL undetectable), neurosyphilis.                  | no data                         | housed                  | no data                                               |
| none.                                        | none                                                                                                             | UC, colorectal CA (paraneoplastic syndrome)                     | none                            | housed                  | none                                                  |
| none.                                        | none                                                                                                             | no infectious diagnosis.                                        | no data                         | housed                  | none                                                  |

|         |                   |                                                                           |         |                         |         |
|---------|-------------------|---------------------------------------------------------------------------|---------|-------------------------|---------|
| no data | no data           | no data                                                                   | no data | housed                  | no data |
| no data | no data           | no data                                                                   | no data | housed                  | no data |
| none.   | none.             | colorectal CA, IgA nephropathy, hypothyroid, celiac disease               | no data | housed                  | no data |
| none.   | none              | HIV (CD4 = 70, 24%); VL= undetectable, HCV cirrhosis, portal HTN, varices | no data | previous homelessness   | no data |
| no data | no data           | no data                                                                   | no data | housed                  | no data |
| no data | no data           | trauma                                                                    | no data | housed                  | no data |
| no data | no data           | ESRD (HD), T2DM, DLP                                                      | no data | housed remote community | no data |
| no data | no data           | CAD                                                                       | no data | housed                  | no data |
| no data | no data           | ESRD (HD)                                                                 | no data | housed                  | no data |
| none.   | doxycycline (14d) | none                                                                      | no data | housed                  | no data |
| none.   | none              | no data                                                                   | no data | housed                  | no data |

Confidential

1  
2  
3  
4  
5  
6  
7  
8  
9  
10  
11  
12  
13  
14  
15  
16  
17  
18  
19  
20  
21  
22  
23  
24  
25  
26  
27  
28  
29  
30  
31  
32  
33  
34  
35  
36  
37  
38  
39  
40  
41  
42  
43  
44  
45  
46  
47  
48  
49  
50  
51  
52  
53  
54  
55  
56  
57  
58  
59  
60

|                                                   |
|---------------------------------------------------|
| <b>interpretation</b>                             |
| possible <i>B. quintana</i>                       |
| possible cross reaction:                          |
| possible <i>Bartonella</i> spp.                   |
| possible cross-reaction: syphilis                 |
| false positive                                    |
| possible cross-reaction: <i>H. pylori</i>         |
| false positive                                    |
| possible <i>Bartonella</i> spp.                   |
| no data                                           |
| no data                                           |
| possible <i>B. quintana</i>                       |
| unclear                                           |
| probable <i>B. henselae</i>                       |
| unclear                                           |
| unclear                                           |
| no data                                           |
| possible cross-reaction: syphilis                 |
| unclear                                           |
| unclear                                           |
| unclear                                           |
| unclear                                           |
| possible cross-reaction: <i>Coxiella burnetii</i> |
| possible cross-reaction: syphilis                 |
| unclear                                           |
| possible cross-reaction: syphilis                 |
| possible cross-reaction: auto-immunity            |
| unclear                                           |

Confidential

|    |                               |
|----|-------------------------------|
| 1  |                               |
| 2  | unclear                       |
| 3  | unclear                       |
| 4  | possible cross-               |
| 5  | reaction: auto-               |
| 6  | immunity                      |
| 7  |                               |
| 8  | possible <i>B. quintana</i>   |
| 9  |                               |
| 10 |                               |
| 11 |                               |
| 12 |                               |
| 13 | no data                       |
| 14 | no data                       |
| 15 | possible remote <i>B.</i>     |
| 16 | <i>quintana</i> exposure      |
| 17 | unclear                       |
| 18 | unclear                       |
| 19 | possible cross-               |
| 20 | reaction with <i>Borrelia</i> |
| 21 | unclear                       |
| 22 |                               |
| 23 |                               |
| 24 |                               |
| 25 |                               |
| 26 |                               |
| 27 |                               |
| 28 |                               |
| 29 |                               |
| 30 |                               |
| 31 |                               |
| 32 |                               |
| 33 |                               |
| 34 |                               |
| 35 |                               |
| 36 |                               |
| 37 |                               |
| 38 |                               |
| 39 |                               |
| 40 |                               |
| 41 |                               |
| 42 |                               |
| 43 |                               |
| 44 |                               |
| 45 |                               |
| 46 |                               |
| 47 |                               |
| 48 |                               |
| 49 |                               |
| 50 |                               |
| 51 |                               |
| 52 |                               |
| 53 |                               |
| 54 |                               |
| 55 |                               |
| 56 |                               |
| 57 |                               |
| 58 |                               |
| 59 |                               |
| 60 |                               |

Confidential



## Data Collection/Capture Sheet

(To be used with Master List)

**Protocol Title:** "Bartonella quintana, "trench fever", in Manitoba: epidemiology, risk factors, clinical manifestations and vector surveillance"

**Principal Investigator:** Dr. Carl Boodman, Room 543 - 745 Bannatyne Avenue, University of Manitoba, Winnipeg, Manitoba R3E 0J9, Canada, 431-374-4187

**Co-Investigator:** Dr. Yoav Keynan, Room 543 - 745 Bannatyne Avenue, University of Manitoba, Winnipeg, Manitoba R3E 0J9, Canada, 204 977-5609

Data to be collected on paper: No

Data to be entered directly into computer spread sheet Yes

**Data Elements to be collected:**

**Demographic data and identifiers**

Age: \_\_\_\_\_

Gender: \_\_\_\_\_

First three digits of postal code (if applicable): \_\_\_\_\_

Admission date (if applicable): \_\_\_\_\_

Discharge date (if applicable): \_\_\_\_\_

**Data elements from chart or database:**

Comorbidities:

Bartonella serology titer: IgG/IGM

16 s Bartonella speciation (if available):

Antimicrobial therapy and duration:

Significant laboratory abnormalities:

Significant abnormalities on imaging (? Vegetations, mycotic aneurysms):

Description of housing history (eg: shelters, "tent encampments"):

Immunosuppression (eg: steroids):

Substance use disorder (specifically, alcohol):

Clinical manifestations, specifically:

- Endocarditis
- abdominal pain (splenomegaly?)
- Rash or evidence of ectoparasitosis and location:
- Mycotic aneurysms
- neurologic symptoms
- Fever
- Arthralgia (specifically shin or leg pain?)
- Embolization events

Clinical outcome?:

Data collected by (printed name and signature): \_\_\_\_\_

Date Data collected: \_\_\_\_\_
